# Supplementary material for: Transcriptomic Analysis of Self-Incompatibility in Alfalfa
Source: MDPI journal article supplement (doi:10.3390/plants13060875), 2024-03-19
Supplement: s1 [file s1]

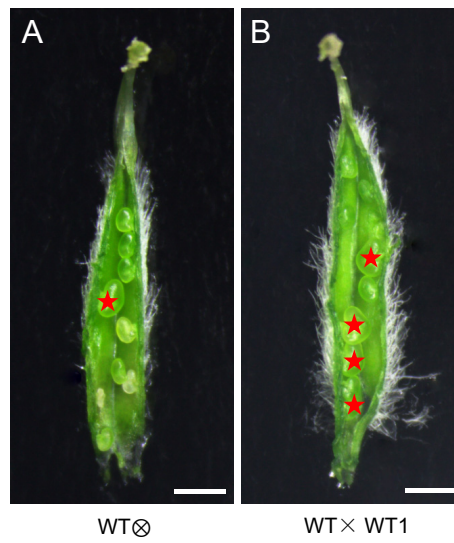

**Figure S1.** Dissected pistils at 48 h after self-pollination (A) and cross-pollination (B) Bars = 1 mm, The asterisks indicate the developing ovules.

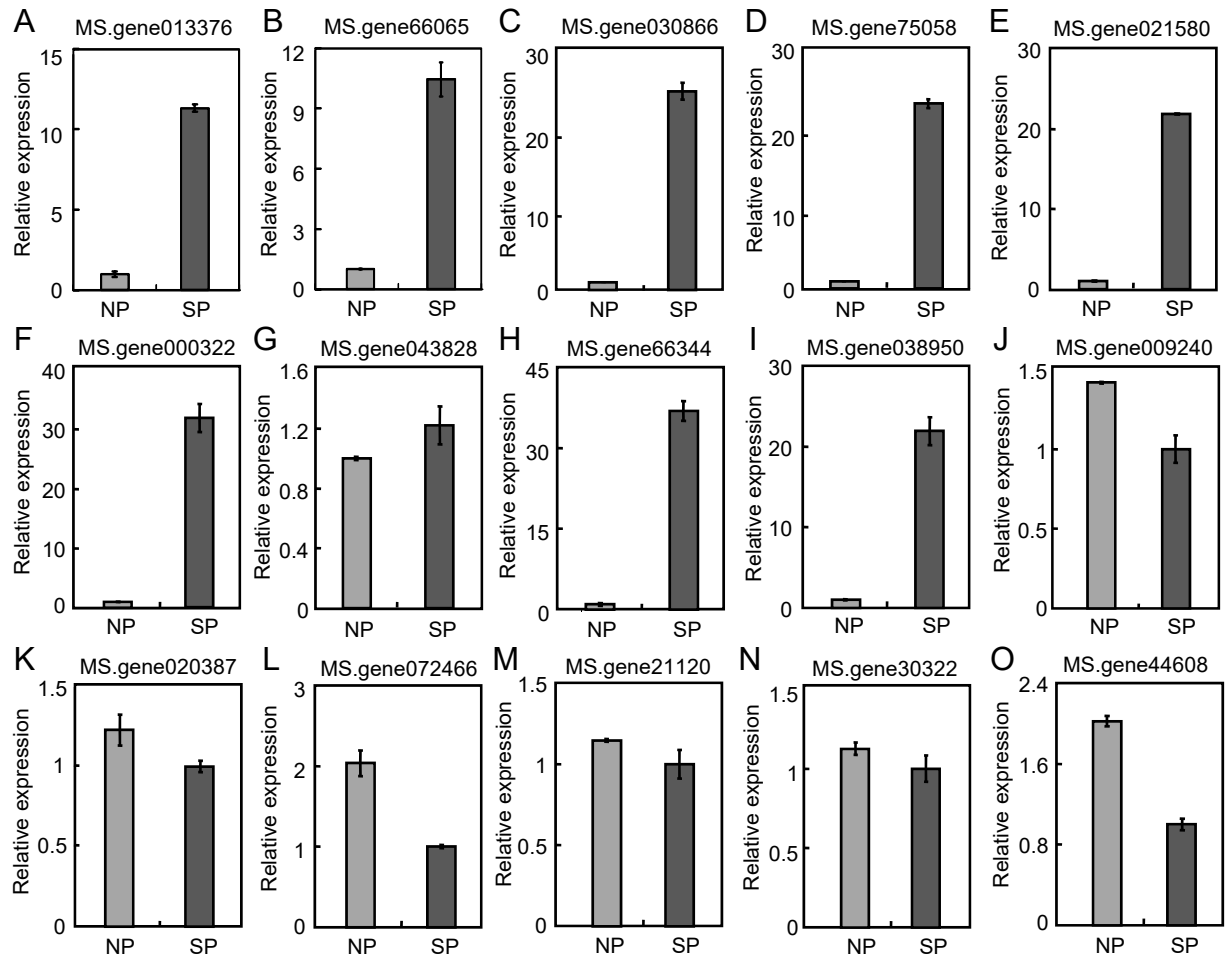

**Figure S2.** (A) to (O) Relative expression of 15 randomly selected genes in RNA-seq in non-pollinated pistils and self-pollinated pistils 24h after self-pollination. The expression patterns of these genes were consistent with the transcriptomic analysis.

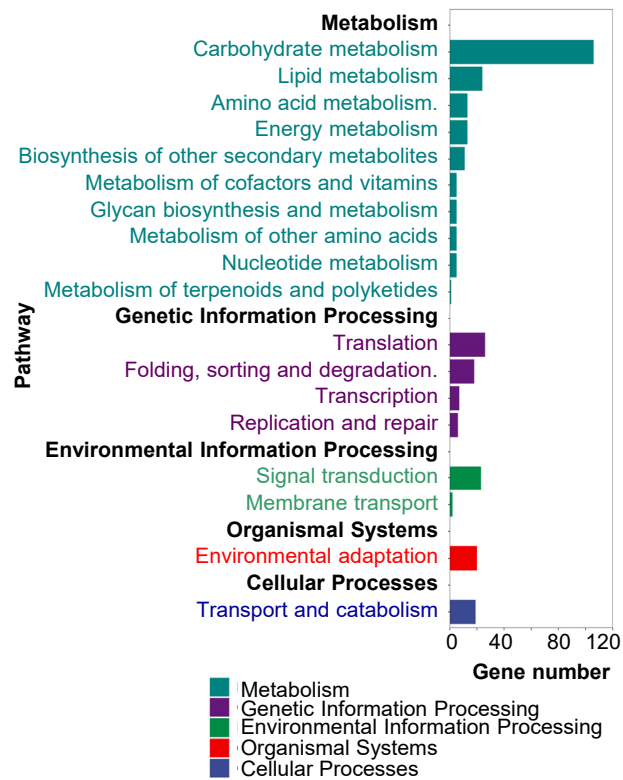

**Figure S3.** KEGG enrichment analysis of the DEGs in five categories.

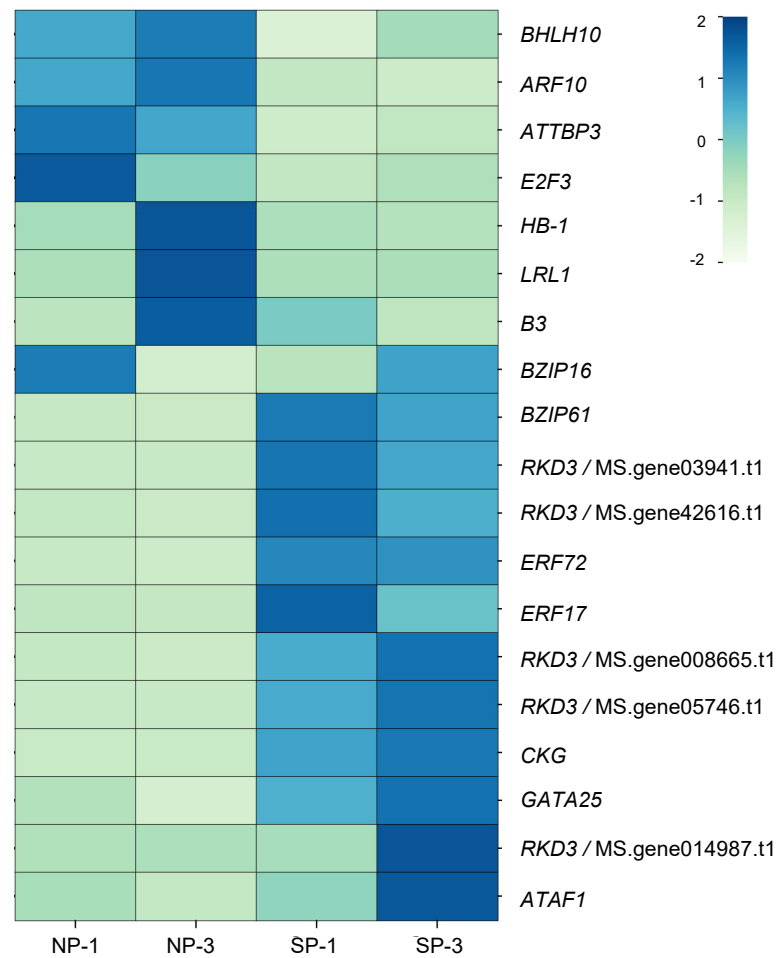

**Figure S4.** Expression profiles of crucial candidate TF genes related to SI in alfalfa. Pale yellow and blue represent relative decreases and increases in expression, respectively ( $\log_2^{\text{FPKM}+1}$ ).

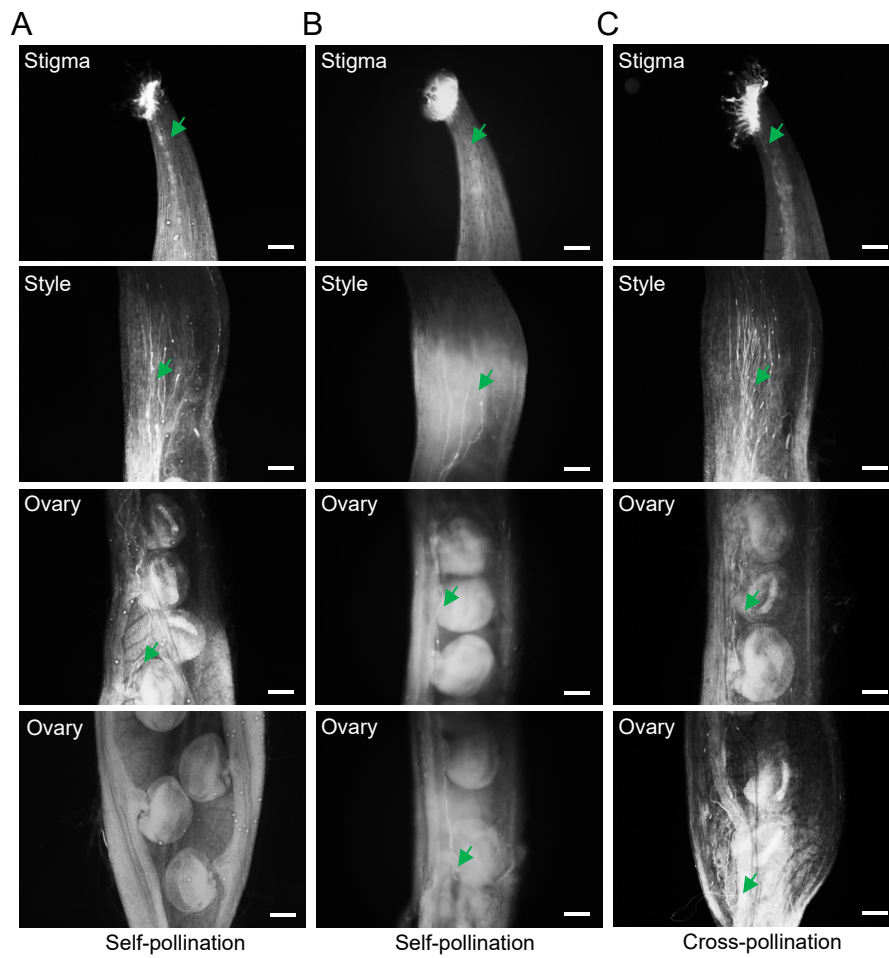

**Figure S5.** Aniline blue staining of pollen tubes (with ovary) 24 h after self-pollination (A, B) and cross-pollination (C), respectively. Green arrowheads indicate pollen tubes. Bars = 100  $\mu$ m.

**Table S1.** The statistical data of developing ovules at 48 h after self-pollination and cross-pollination.

|      | WT⊗          |                   | WT× WT1      |                   |
|------|--------------|-------------------|--------------|-------------------|
|      | Total ovules | Developing ovules | Total ovules | Developing ovules |
|      | 11           | 3                 | 10           | 3                 |
|      | 8            | 1                 | 10           | 5                 |
|      | 10           | 2                 | 9            | 6                 |
|      | 11           | 0                 | 9            | 3                 |
|      | 9            | 1                 | 10           | 1                 |
|      | 8            | 2                 | 10           | 7                 |
|      | 10           | 3                 | 10           | 3                 |
|      | 10           | 1                 | 8            | 2                 |
|      | 10           | 0                 | 11           | 5                 |
|      | 10           | 2                 | 11           | 4                 |
|      | 10           | 3                 | 11           | 3                 |
|      | 9            | 1                 | 10           | 5                 |
| mean | 9.7          | 1.6               | 9.9          | 3.9               |
| SD   | 0.98         | 1.08              | 0.90         | 1.73              |

**Table S2.** The randomly selected sequences subjected to RT-qPCR analysis and their corresponding primers.

| Gene name     | log <sub>2</sub> FoldChange | Primer name  | Sequence (5'-3')       |
|---------------|-----------------------------|--------------|------------------------|
| MS.gene000322 | 9.43124951                  | 322-qPCR-F   | GCGTGCTCTGAATGTGACAA   |
|               |                             | 322-qPCR-R   | GGTGCCATCTTCAACAACGT   |
| MS.gene013376 | 8.53728926                  | 13376-qPCR-F | TTGGGATTGGCTGGTAATGC   |
|               |                             | 13376-qPCR-R | TCCAATCAACATGCTTGCCA   |
| MS.gene021580 | 10.14372115                 | 21580-qPCR-F | GGCATACTCTTGACCACCCT   |
|               |                             | 21580-qPCR-R | GTCCATCTCACCCCTACCAA   |
| MS.gene030866 | 8.632265229                 | 30866-qPCR-F | ACAACGTTAGGAGCAGGGAA   |
|               |                             | 30866-qPCR-R | GGGCGATTAACCTTGCTGAG   |
| MS.gene038950 | 10.02934027                 | 38950-qPCR-F | CAGGAACGAGCAAACACCAA   |
|               |                             | 38950-qPCR-R | CAGTCACGGTAGAATTGGCG   |
| MS.gene043828 | 9.659001868                 | 43828-qPCR-F | ATCCTCAAGTGCAGTCCCTC   |
|               |                             | 43828-qPCR-R | TTGGGTGTTGATGTCTCCG    |
| MS.gene66065  | 8.595550347                 | 66065-qPCR-F | GACATGCCATCACCAACACA   |
|               |                             | 66065-qPCR-R | CATGGCTTCATCAACGGCTT   |
| MS.gene66344  | 10.02737993                 | 66344-qPCR-F | GCCACATTTGCCCTCTTCTC   |
|               |                             | 66344-qPCR-R | TGATTCCCAACGTGTACAC    |
| MS.gene75058  | 9.247972758                 | 75058-qPCR-F | GGCGAGAAACCATGTGATGA   |
|               |                             | 75058-qPCR-R | ATTCGCTCAACAAGATGCCC   |
| MS.gene009240 | -8.444276124                | 9240-qPCR-F  | ATGCAGCCAACATCACCTTG   |
|               |                             | 9240-qPCR-R  | AATAGGTGGATGAGGGCTCC   |
| MS.gene020387 | -10.83562464                | 20387-qPCR-F | AATCTTCAGGGTAGTCGGGC   |
|               |                             | 20387-qPCR-R | GCTTGCTGGTTCCATTTGC    |
| MS.gene21120  | -8.183796722                | 21120-qPCR-F | ATCTGGAGGACGCACAATGA   |
|               |                             | 21120-qPCR-R | CCTGCCACACATCATAAGCC   |
| MS.gene30322  | -7.836183848                | 30322-qPCR-F | CCATTGCAGCATACATAGGACA |
|               |                             | 30322-qPCR-R | GCGTGAAATTCCTACTCCACC  |
| MS.gene44608  | -8.097665361                | 44608-qPCR-F | AAAGGAACGCATCTGGAGGA   |
|               |                             | 44608-qPCR-R | TCCAGCTTTCATAGGCCCAA   |
| MS.gene072466 | -8.940955964                | 72466-qPCR-F | CCTATGGGTTGGCGGAAATG   |
|               |                             | 72466-qPCR-R | TCAGTGAAGTTCCCCATCCC   |

**Table S3.** The enriched KEGG pathways that might be related to SI in alfalfa.

| Pathway | Pathway class | Pathway subclass                            | Description                                         | p value     |
|---------|---------------|---------------------------------------------|-----------------------------------------------------|-------------|
| ko00010 | Metabolism    | Carbohydrate metabolism                     | Glycolysis / Gluconeogenesis                        | 0.961244734 |
| ko00020 | Metabolism    | Carbohydrate metabolism                     | Citrate cycle (TCA cycle)                           | 0.838421643 |
| ko00030 | Metabolism    | Carbohydrate metabolism                     | Pentose phosphate pathway                           | 0.7017311   |
| ko00040 | Metabolism    | Carbohydrate metabolism                     | Pentose and glucuronate interconversions            | 5.28E-39    |
| ko00051 | Metabolism    | Carbohydrate metabolism                     | Fructose and mannose metabolism                     | 0.807176703 |
| ko00052 | Metabolism    | Carbohydrate metabolism                     | Galactose metabolism                                | 0.918618236 |
| ko00053 | Metabolism    | Carbohydrate metabolism                     | Ascorbate and aldarate metabolism                   | 1.39E-06    |
| ko00061 | Metabolism    | Lipid metabolism                            | Fatty acid biosynthesis                             | 0.830957858 |
| ko00071 | Metabolism    | Lipid metabolism                            | Fatty acid degradation                              | 0.843214174 |
| ko00073 | Metabolism    | Lipid metabolism                            | Cutin, suberine and wax biosynthesis                | 0.809332449 |
| ko00100 | Metabolism    | Lipid metabolism                            | Steroid biosynthesis                                | 0.013048419 |
| ko00190 | Metabolism    | Energy metabolism                           | Oxidative phosphorylation                           | 0.764291477 |
| ko00220 | Metabolism    | Amino acid metabolism                       | Arginine biosynthesis                               | 0.802025168 |
| ko00230 | Metabolism    | Nucleotide metabolism                       | Purine metabolism                                   | 0.871958469 |
| ko00240 | Metabolism    | Nucleotide metabolism                       | Pyrimidine metabolism                               | 0.886410909 |
| ko00260 | Metabolism    | Amino acid metabolism                       | Glycine, serine and threonine metabolism            | 0.891871645 |
| ko00261 | Metabolism    | Biosynthesis of other secondary metabolites | Monobactam biosynthesis                             | 0.129776886 |
| ko00270 | Metabolism    | Amino acid metabolism                       | Cysteine and methionine metabolism                  | 0.385624426 |
| ko00280 | Metabolism    | Amino acid metabolism                       | Valine, leucine and isoleucine degradation          | 0.153074214 |
| ko00290 | Metabolism    | Amino acid metabolism                       | Valine, leucine and isoleucine biosynthesis         | 0.009671692 |
| ko00300 | Metabolism    | Amino acid metabolism                       | Lysine biosynthesis                                 | 0.567669452 |
| ko00400 | Metabolism    | Amino acid metabolism                       | Phenylalanine, tyrosine and tryptophan biosynthesis | 0.565742075 |
| ko00430 | Metabolism    | Metabolism of other amino acids             | Taurine and hypotaurine metabolism                  | 0.486313901 |
| ko00440 | Metabolism    | Metabolism of other amino acids             | Phosphonate and phosphinate metabolism              | 0.218704244 |
| ko00450 | Metabolism    | Metabolism of other amino acids             | Selenocompound metabolism                           | 0.526967681 |
| ko00460 | Metabolism    | Metabolism of other amino acids             | Cyanoamino acid metabolism                          | 0.974799551 |
| ko00480 | Metabolism    | Metabolism of other amino acids             | Glutathione metabolism                              | 0.986978685 |
| ko00500 | Metabolism    | Carbohydrate metabolism                     | Starch and sucrose metabolism                       | 0.370137402 |
| ko00510 | Metabolism    | Glycan biosynthesis and metabolism          | N-Glycan biosynthesis                               | 0.54840215  |
| ko00513 | Metabolism    | Glycan biosynthesis and metabolism          | Various types of N-glycan biosynthesis              | 0.416831918 |
| ko00520 | Metabolism    | Carbohydrate metabolism                     | Amino sugar and nucleotide sugar metabolism         | 0.437780772 |
| ko00531 | Metabolism    | Glycan biosynthesis and metabolism          | Glycosaminoglycan degradation                       | 0.034254364 |
| ko00561 | Metabolism    | Lipid metabolism                            | Glycerolipid metabolism                             | 0.203677527 |
| ko00562 | Metabolism    | Carbohydrate metabolism                     | Inositol phosphate metabolism                       | 0.123166704 |
| ko00564 | Metabolism    | Lipid metabolism                            | Glycerophospholipid metabolism                      | 0.006189054 |
| ko00565 | Metabolism    | Lipid metabolism                            | Ether lipid metabolism                              | 0.012501572 |
| ko00590 | Metabolism    | Lipid metabolism                            | Arachidonic acid metabolism                         | 0.259524391 |
| ko00591 | Metabolism    | Lipid metabolism                            | Linoleic acid metabolism                            | 0.393086613 |
| ko00592 | Metabolism    | Lipid metabolism                            | alpha-Linolenic acid metabolism                     | 0.017973497 |
| ko00600 | Metabolism    | Lipid metabolism                            | Sphingolipid metabolism                             | 0.444754945 |
| ko00620 | Metabolism    | Carbohydrate metabolism                     | Pyruvate metabolism                                 | 0.697077399 |
| ko00630 | Metabolism    | Carbohydrate metabolism                     | Glyoxylate and dicarboxylate metabolism             | 0.848571144 |
| ko00660 | Metabolism    | Carbohydrate metabolism                     | C5-Branched dibasic acid metabolism                 | 0.312044722 |
| ko00710 | Metabolism    | Energy metabolism                           | Carbon fixation in photosynthetic organisms         | 0.951308967 |
| ko00770 | Metabolism    | Metabolism of cofactors and vitamins        | Pantothenate and CoA biosynthesis                   | 0.105313994 |
| ko00860 | Metabolism    | Metabolism of cofactors and vitamins        | Porphyrin metabolism                                | 0.930022123 |
| ko00900 | Metabolism    | Metabolism of terpenoids and polyketides    | Terpenoid backbone biosynthesis                     | 0.847865076 |
| ko00901 | Metabolism    | Biosynthesis of other secondary metabolites | Indole alkaloid biosynthesis                        | 0.252466934 |
| ko00910 | Metabolism    | Energy metabolism                           | Nitrogen metabolism                                 | 0.18394727  |
| ko00920 | Metabolism    | Energy metabolism                           | Sulfur metabolism                                   | 0.182088663 |
| ko00940 | Metabolism    | Biosynthesis of other secondary metabolites | Phenylpropanoid biosynthesis                        | 0.982424699 |
| ko00943 | Metabolism    | Biosynthesis of other secondary metabolites | Isoflavonoid biosynthesis                           | 0.846715398 |
| ko00966 | Metabolism    | Biosynthesis of other secondary metabolites | Glucosinolate biosynthesis                          | 0.730564507 |

Continued



**Table S3.** The enriched KEGG pathways that might be related to SI in alfalfa

| Pathway | Pathway class                        | Pathway subclass                 | Description                                 | <i>p</i> value |
|---------|--------------------------------------|----------------------------------|---------------------------------------------|----------------|
| ko00970 | Genetic Information Processing       | Translation                      | Aminoacyl-tRNA biosynthesis                 | 0.971334653    |
| ko02010 | Environmental Information Processing | Membrane transport               | ABC transporters                            | 0.882445449    |
| ko03008 | Genetic Information Processing       | Translation                      | Ribosome biogenesis in eukaryotes           | 0.660531836    |
| ko03010 | Genetic Information Processing       | Translation                      | Ribosome                                    | 0.148477398    |
| ko03013 | Genetic Information Processing       | Translation                      | Nucleocytoplasmic transport                 | 0.990360695    |
| ko03015 | Genetic Information Processing       | Translation                      | mRNA surveillance pathway                   | 0.745609207    |
| ko03018 | Genetic Information Processing       | Folding, sorting and degradation | RNA degradation                             | 0.808587675    |
| ko03020 | Genetic Information Processing       | Transcription                    | RNA polymerase                              | 0.919230077    |
| ko03030 | Genetic Information Processing       | Replication and repair           | DNA replication                             | 0.999938895    |
| ko03040 | Genetic Information Processing       | Transcription                    | Spliceosome                                 | 0.981486808    |
| ko03050 | Genetic Information Processing       | Folding, sorting and degradation | Proteasome                                  | 0.539467558    |
| ko03410 | Genetic Information Processing       | Replication and repair           | Base excision repair                        | 0.910231247    |
| ko03420 | Genetic Information Processing       | Replication and repair           | Nucleotide excision repair                  | 0.999997773    |
| ko03430 | Genetic Information Processing       | Replication and repair           | Mismatch repair                             | 0.999993383    |
| ko03440 | Genetic Information Processing       | Replication and repair           | Homologous recombination                    | 0.999288456    |
| ko04016 | Environmental Information Processing | Signal transduction              | MAPK signaling pathway - plant              | 0.947414312    |
| ko04070 | Environmental Information Processing | Signal transduction              | Phosphatidylinositol signaling system       | 0.161747581    |
| ko04075 | Environmental Information Processing | Signal transduction              | Plant hormone signal transduction           | 0.45490642     |
| ko04120 | Genetic Information Processing       | Folding, sorting and degradation | Ubiquitin mediated proteolysis              | 0.999647294    |
| ko04130 | Genetic Information Processing       | Folding, sorting and degradation | SNARE interactions in vesicular transport   | 0.051601555    |
| ko04141 | Genetic Information Processing       | Folding, sorting and degradation | Protein processing in endoplasmic reticulum | 0.998207156    |
| ko04144 | Cellular Processes                   | Transport and catabolism         | Endocytosis                                 | 0.284667919    |
| ko04145 | Cellular Processes                   | Transport and catabolism         | Phagosome                                   | 0.513984045    |
| ko04146 | Cellular Processes                   | Transport and catabolism         | Peroxisome                                  | 0.887920802    |
| ko04626 | Organismal Systems                   | Environmental adaptation         | Plant-pathogen interaction                  | 0.113339518    |

**Table S4.** DEGs involved in the SI of alfalfa.

| Gene ID          | Annotation                                                   |
|------------------|--------------------------------------------------------------|
| MS.gene03476.t1  | F-box protein                                                |
| MS.gene054335.t1 | F-box protein                                                |
| MS.gene42062.t1  | F-box protein                                                |
| MS.gene57177.t1  | F-box-like WD repeat-containing protein                      |
| MS.gene74882.t1  | Serine threonine-protein kinase                              |
| MS.gene07587.t1  | Serine threonine-protein kinase                              |
| MS.gene005037.t1 | Serine threonine-protein kinase                              |
| MS.gene070934.t1 | Serine threonine-protein kinase                              |
| MS.gene54823.t1  | Serine threonine-protein kinase                              |
| MS.gene065848.t1 | Serine threonine-protein kinase                              |
| MS.gene067504.t1 | LRR receptor-like serine threonine-protein kinase            |
| MS.gene00953.t1  | Receptor-like cytosolic serine threonine-protein kinase      |
| MS.gene03081.t1  | LRR receptor-like serine threonine-protein kinase            |
| MS.gene051225.t1 | Serine threonine-protein kinase                              |
| MS.gene048989.t1 | LRR receptor-like serine threonine-protein kinase            |
| MS.gene070324.t1 | LRR receptor-like serine threonine-protein kinase            |
| MS.gene53398.t1  | LRR receptor-like serine threonine-protein kinase            |
| MS.gene39640.t1  | Receptor-like serine threonine-protein kinase                |
| MS.gene068586.t1 | Receptor-like cytosolic serine threonine-protein kinase RBK1 |
| MS.gene001042.t1 | Serine threonine-protein kinase                              |
| MS.gene68843.t1  | LRR receptor-like serine threonine-protein kinase            |
| MS.gene031103.t1 | Serine threonine-protein kinase                              |
| MS.gene75108.t1  | LRR receptor-like serine threonine-protein kinase            |
| MS.gene86052.t1  | Serine threonine-protein kinase                              |
| MS.gene66283.t1  | LRR receptor-like serine threonine-protein kinase            |
| MS.gene024491.t1 | Serine threonine-protein kinase                              |
| MS.gene45217.t1  | Serine threonine-protein kinase                              |
| MS.gene072587.t1 | Serine threonine-protein kinase                              |
| MS.gene22844.t1  | Serine threonine-protein kinase                              |
| MS.gene49546.t1  | Serine threonine-protein kinase                              |
| MS.gene008945.t1 | Receptor-like cytosolic serine threonine-protein kinase RBK1 |
| MS.gene84738.t1  | Serine threonine-protein kinase                              |
| MS.gene89935.t1  | Calcium-dependent protein kinase                             |
| MS.gene056364.t1 | Calcium-dependent protein kinase                             |
| MS.gene030537.t1 | Calcium-dependent protein kinase                             |
| MS.gene28353.t1  | Calcium-dependent protein kinase                             |
| MS.gene54572.t1  | Calcium-dependent protein kinase                             |
| MS.gene003898.t1 | Calcium-dependent protein kinase                             |
| MS.gene016961.t1 | Calcium-dependent protein kinase                             |
| MS.gene47650.t1  | Calcium-dependent protein kinase                             |
| MS.gene70857.t1  | Calcium-dependent protein kinase                             |
